# Supplementary material for: A three-phase microfluidic chip for rapid sample clean-up of alkaloids from plant extracts
Source: Royal Society of Chemistry journal article supplement (doi:10.1039/b822106e), 2009-01-01
Supplement: b822106e.pdf [file b822106e.pdf]

† Electronic Supplementary Information (ESI) available: See 40 a) Flow rate of the system 1:1:1  $\mu\text{L}/\text{min}$   
DOI: 10.1039/b000000x/

### Phase separation in two- and three-phase microchips

5

Streams of water and chloroform (Sudan dye) for a) an uncoated two-phase chip, b) a selectively non-polar coated two-phase chip, and c) a selectively non-polar coated three-phase chip at various flow rates

10

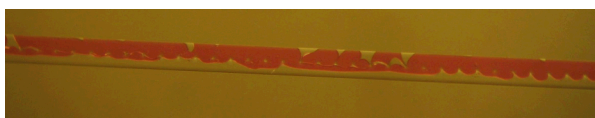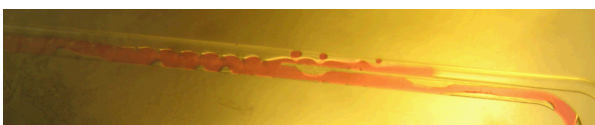

15

a)

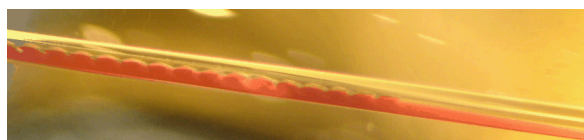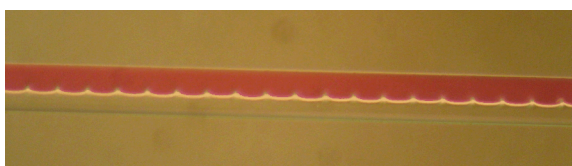

20

b)

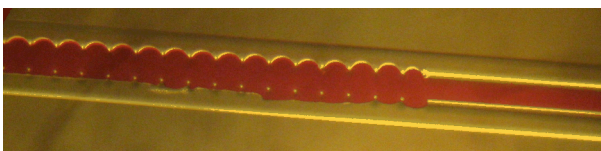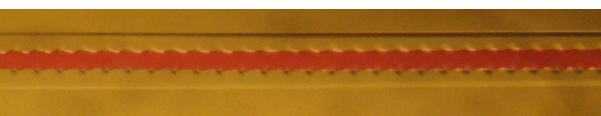

25

c)

### Model data obtained with change of various parameters

Modeling results obtained by changing two parameters (viscosity of organic solvent and flow rate of the system) (— is basic aq. phase model data; -- is chloroform model data; -●- is acidic aq. phase model data).

30

35

### 40 a) Flow rate of the system 1:1:1 $\mu\text{L}/\text{min}$

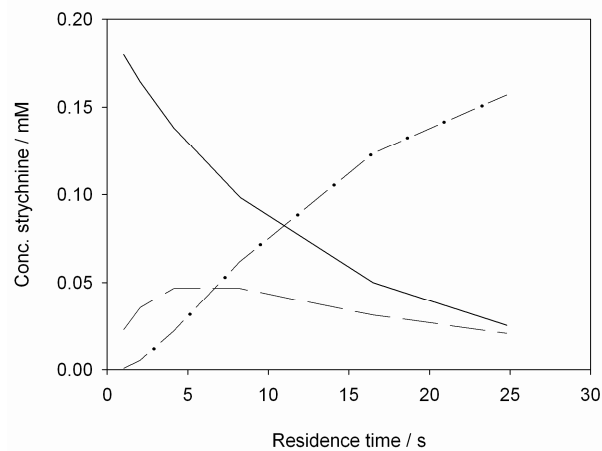

### b) Narrow width of the middle (organic) channel

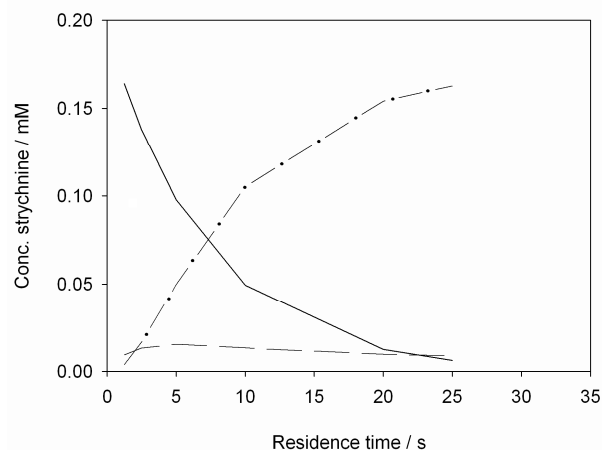

45

### c) Change of organic solvent

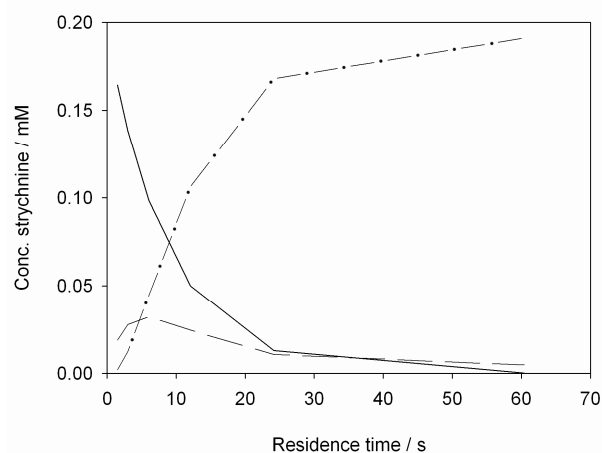

50

e) Standard case with channel length - 9.3 cm

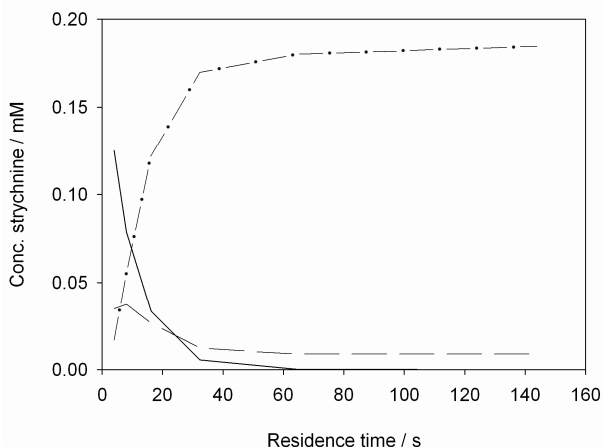

20 MS-TIC profile of strychnine injection obtained using a two-phase microchip

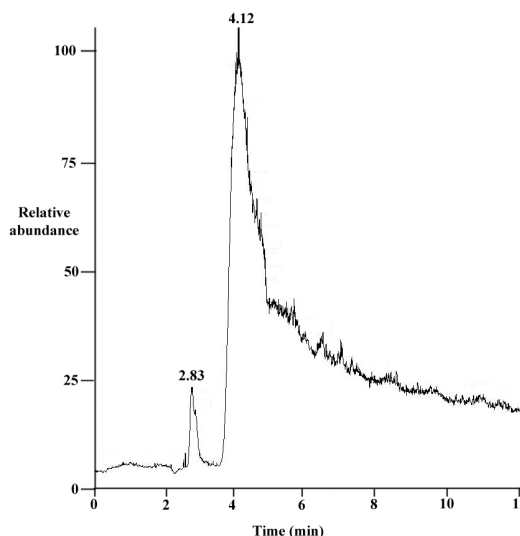

f) change of organic solvent with channel length - 9.3 cm

5

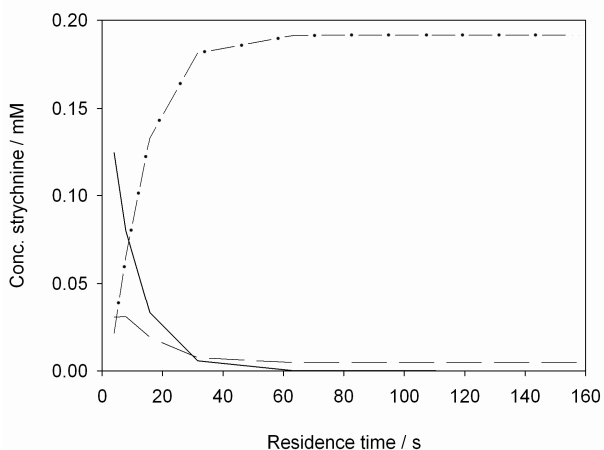

25 (+)-ESI-mass spectrum of strychnine injection obtained using a two-phase microchip

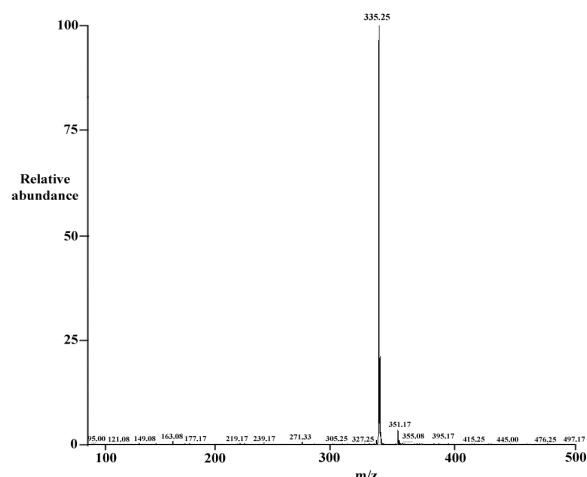

Schematic design of on-line screening of plant extracts using three-phase chip interfaced with nanospray ESI-MS

10

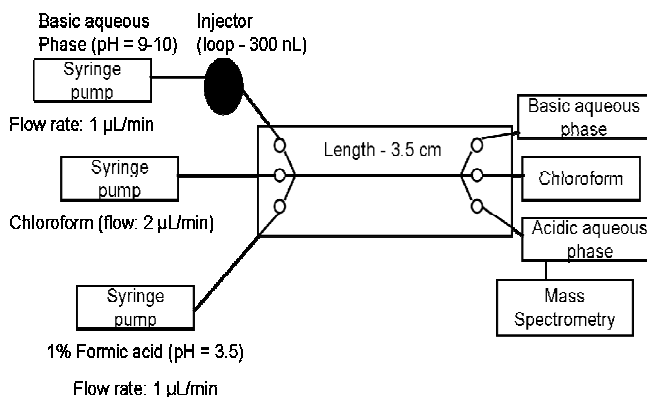

30 A visual representation of three-phase microchip extraction efficiency at a flow rate of 0.5:1:0.5 µL/min flow rate, 12.5 sec residence time

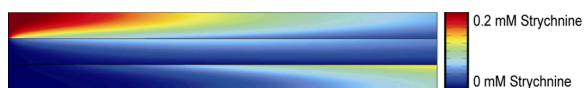

35 Wilke-Chang equation<sup>25</sup>

$$D = 7.4 \times 10^{-8} \frac{(xM)^{1/2} T}{\eta V^{0.6}}$$

D = diffusion coefficient, cm<sup>2</sup>/sec

40 x = association parameter, multiple of nominal molecular weight of solvent to give effective value

M = molecular weight of solvent

15

---

T = temperature, °K

$\eta$  = viscosity of solution, centipoise

$\bar{V}$  = molar volume of solute at normal boiling point, cm<sup>3</sup>/mole
